# Supplementary material
Source: publisher figshare collection journal article supplement (https://sage.figshare.com/ndownloader/files/36009566)
Supplement: Supplementary file 1 [file 36009566]

**Supplementary Figure**

| 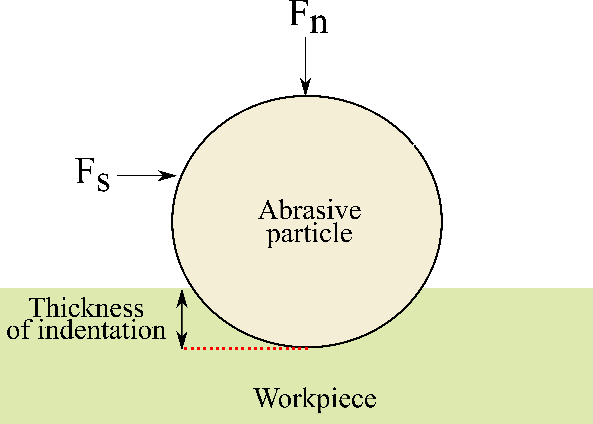 |
| --- |
|  |
| **Fig. 6.1** Forces applied on workpiece by a single abrasive particle |
|  |
|  |

**Supplementary Table**

**Table 2.1.** Mechanical properties of UHMWPE

| **Properties** | **Magnitude** |
| --- | --- |
| Impact strength | 150 kJ m-2 |
| Tensile strength | 40 MPa |
| Density | 940 kg m-3 |
| Hardness | 45 HRB |
| Molecular weight | 3×106 g mol-1 |
